# Supplementary material for: Deep learning analysis of epicardial adipose tissue to predict cardiovascular risk in heavy smokers
Source: Springer Nature journal article supplement (doi:10.1038/s43856-024-00475-1), 2024-03-13
Supplement: 43856_2024_475_MOESM2_ESM.pdf [file 43856_2024_475_MOESM2_ESM.pdf]

# Deep Learning Analysis of Epicardial Adipose Tissue to Predict Cardiovascular Risk in Heavy Smokers

**Running title:** Epicardial fat & cardiovascular risk on non-gated chest CT

Borek Foldyna<sup>1</sup>, Ibrahim Hadzic<sup>2,3,4</sup>, Roman Zeleznik<sup>2,3</sup>, Marcel C Langenbach<sup>1,5</sup>, Vineet K Raghu<sup>1</sup>,  
Thomas Mayrhofer<sup>1,6</sup>, Michael T Lu<sup>1</sup>, Hugo JWL Aerts<sup>2,3,4</sup>

<sup>1</sup> Cardiovascular Imaging Research Center (CIRC), Massachusetts General Hospital – Harvard Medical School, Boston, USA

<sup>2</sup> Artificial Intelligence in Medicine (AIM) Program, Mass General Brigham, Harvard Medical School, Boston, Massachusetts, USA

<sup>3</sup> Department of Radiation Oncology, Brigham and Women's Hospital, Dana-Farber Cancer Institute, Harvard Medical School, Boston, USA

<sup>4</sup> Radiology and Nuclear Medicine, CARIM & GROW, Maastricht University, Maastricht, The Netherlands

<sup>5</sup> Institute for Diagnostic and Interventional Radiology, University Hospital Cologne, Cologne, Germany

<sup>6</sup> School of Business Studies, Stralsund University of Applied Sciences, Stralsund, Germany

## Supplementary Information

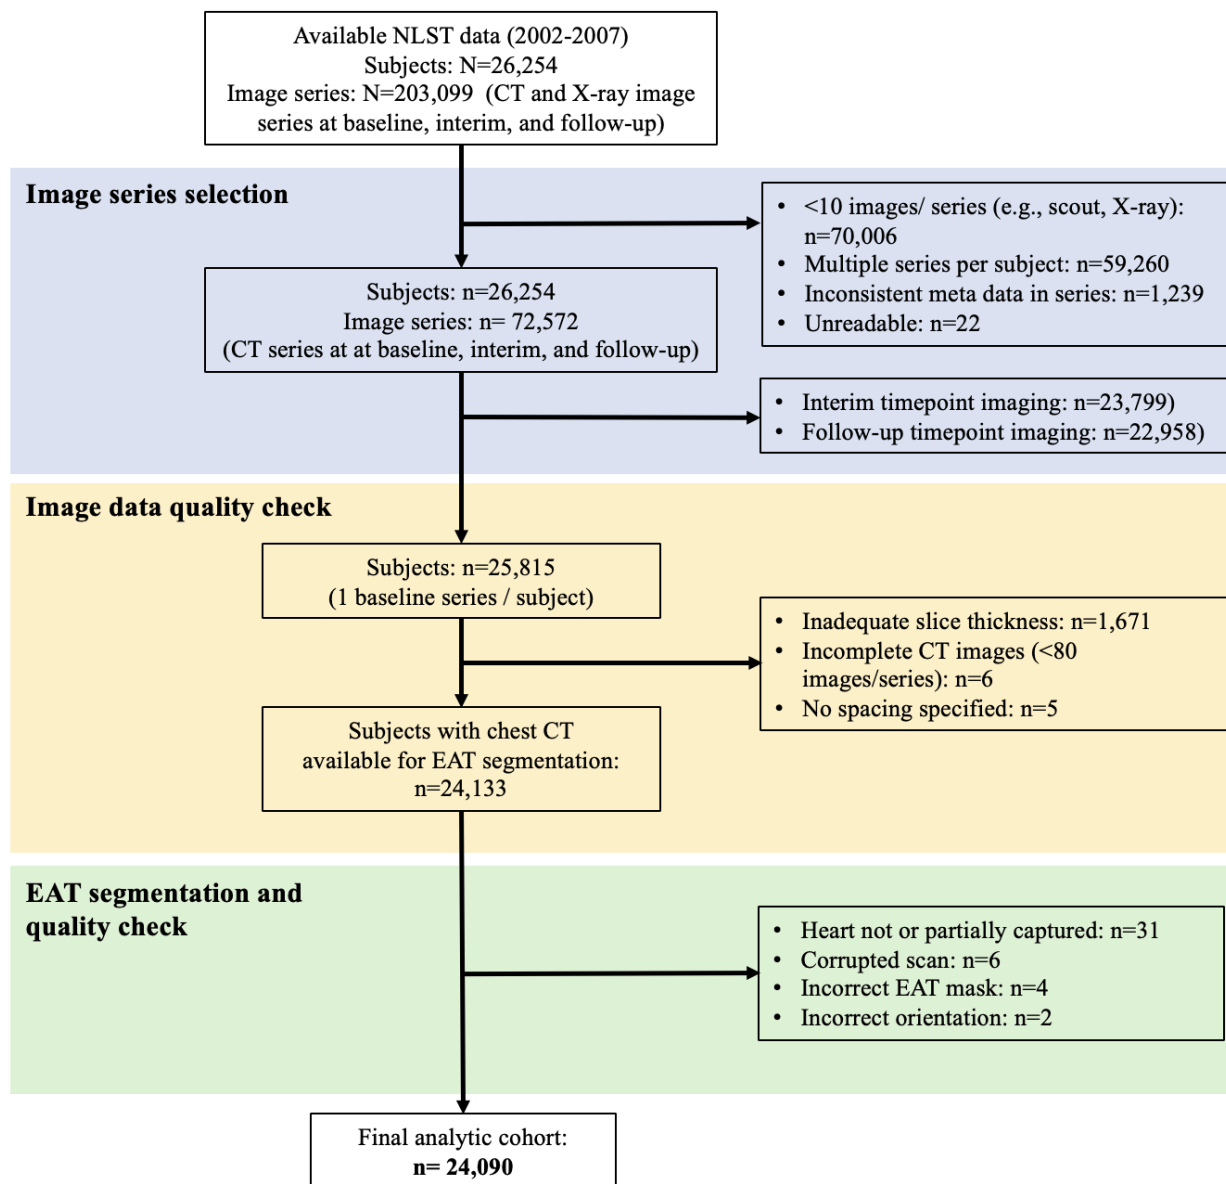

**Supplementary Figure 1.** Participant flow diagram. CT = computed tomography, EAT = epicardial adipose tissue, NLST = National Lung Screening Trial.

|                | Axial                                                                             | Coronal                                                                           | Sagittal                                                                          | 3D - Heart                                                                         | 3D - EAT                                                                            | Reason for failure                                                                                                 |
|----------------|-----------------------------------------------------------------------------------|-----------------------------------------------------------------------------------|-----------------------------------------------------------------------------------|------------------------------------------------------------------------------------|-------------------------------------------------------------------------------------|--------------------------------------------------------------------------------------------------------------------|
| <b>Optimal</b> | 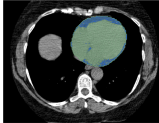 |  |  |  |  | N/A                                                                                                                |
| <b>Failed</b>  |  |  |  |  |  | - corrupted scan;<br>incorrect spacing with<br>overlapping images and<br>image distortion                          |
| <b>Failed</b>  |  |  |  |  |  | - corrupted scan; part of<br>the heart is missing on the<br>CT scan                                                |
| <b>Failed</b>  |  |  |  |  |  | - wrong field of view, CT<br>scan ends at the level of<br>the the scending aorta and<br>does not capture the heart |
| <b>Failed</b>  |  |  |  |  |  | - incorrect image<br>orientation (anterior vs.<br>posterior)                                                       |

**Supplementary Figure 2.** Examples of successful and failed EAT segmentations. CT= computed tomography; EAT = epicardial adipose tissue. CT = computed tomography, EAT = epicardial adipose tissue.

**Supplementary Table 1.** Event distribution across quartiles of EAT volume and density

|           | EAT volume –cm <sup>3</sup> /m <sup>2</sup> | All-cause death |              | P      | CV death     |           | P      |
|-----------|---------------------------------------------|-----------------|--------------|--------|--------------|-----------|--------|
|           |                                             | No              | Yes          |        | No           | Yes       |        |
| <b>Q1</b> | 42.2±8.1                                    | 5,024 (83.7)    | 978 (16.3)   | <0.001 | 5,782 (96.3) | 220 (3.7) | <0.001 |
| <b>Q2</b> | 60.2±4.2                                    | 5,042 (84.0)    | 960 (16.0)   |        | 5,803 (96.7) | 199 (3.3) |        |
| <b>Q3</b> | 75.5±5.0                                    | 4,824 (80.4)    | 1,178 (19.6) |        | 5,719 (95.3) | 283 (4.7) |        |
| <b>Q4</b> | 103.4±17.2                                  | 4,450 (74.1)    | 1,552 (25.9) |        | 5,621 (93.7) | 381 (6.4) |        |
|           | <b>EAT density –HU</b>                      |                 |              |        |              |           |        |
| <b>Q1</b> | -84.3±2.6                                   | 4,697 (78.0)    | 1,326 (22.0) | <0.001 | 5,711 (94.8) | 312 (5.2) | 0.047  |
| <b>Q2</b> | -79.3±1.0                                   | 4,862 (80.7)    | 1,160 (19.3) |        | 5,760 (95.7) | 262 (4.4) |        |
| <b>Q3</b> | -75.9±1.0                                   | 4,940 (82.0)    | 1,083 (18.0) |        | 5,768 (95.8) | 255 (4.2) |        |
| <b>Q4</b> | -71.1±2.3                                   | 4,901 (81.4)    | 1,121 (18.6) |        | 5,762 (95.7) | 260 (4.3) |        |

CV = cardiovascular, EAT = epicardial adipose tissue.

**Supplementary Table 2.** Association of EAT measures with all-cause and cardiovascular mortality in a subgroup of participants **without known CV disease** (coronary artery disease, heart failure, or stroke) at baseline (n=20,454; all-cause mortality: n=3,539; CV death: n=719).

|                                                    | All-cause mortality  |           |        |         |           |        |         |           |        | Cardiovascular mortality |           |        |         |           |        |         |           |        |
|----------------------------------------------------|----------------------|-----------|--------|---------|-----------|--------|---------|-----------|--------|--------------------------|-----------|--------|---------|-----------|--------|---------|-----------|--------|
|                                                    | Model 1 (bivariable) |           |        | Model 2 |           |        | Model 3 |           |        | Model 1 (bivariable)     |           |        | Model 2 |           |        | Model 3 |           |        |
|                                                    | HR                   | 95%CI     | P      | HR      | 95%CI     | P      | HR      | 95%CI     | P      | HR                       | 95%CI     | P      | HR      | 95%CI     | P      | HR      | 95%CI     | P      |
| EAT volume –per 10 cm <sup>3</sup> /m <sup>2</sup> | 1.19                 | 1.17–1.21 | <0.001 | 1.11    | 1.09–1.13 | <0.001 | 1.11    | 1.08–1.14 | <0.001 | 1.25                     | 1.21–1.31 | <0.001 | 1.15    | 1.10–1.20 | <0.001 | 1.14    | 1.08–1.20 | <0.001 |
| EAT density –per 10 HU                             | 1.71                 | 1.55–1.88 | <0.001 | 1.37    | 1.24–1.51 | <0.001 | 1.37    | 1.21–1.55 | <0.001 | 2.16                     | 1.76–2.65 | <0.001 | 1.75    | 1.42–2.15 | <0.001 | 1.81    | 1.38–2.38 | <0.001 |
| Age –years                                         |                      |           |        | 1.09    | 1.08–1.10 | <0.001 | 1.08    | 1.07–1.09 | <0.001 |                          |           |        | 1.10    | 1.09–1.12 | <0.001 | 1.08    | 1.06–1.10 | <0.001 |
| Male sex                                           |                      |           |        | 1.29    | 1.20–1.39 | <0.001 | 1.22    | 1.11–1.34 | <0.001 |                          |           |        | 1.34    | 1.14–1.57 | <0.001 | 1.14    | 0.92–1.42 | 0.235  |
| Race                                               |                      |           |        |         |           |        |         |           |        |                          |           |        |         |           |        |         |           |        |
| White                                              |                      |           |        | Ref.    | -         | -      | Ref.    | -         | -      |                          |           |        | Ref.    | -         | -      | Ref.    | -         | -      |
| African American                                   |                      |           |        | 1.40    | 1.20–1.63 | <0.001 | 1.42    | 1.17–1.75 | 0.001  |                          |           |        | 1.66    | 1.22–2.25 | 0.001  | 1.78    | 1.17–2.73 | 0.008  |
| Asian                                              |                      |           |        | 0.65    | 0.51–0.85 | 0.001  | 0.62    | 0.44–0.86 | 0.004  |                          |           |        | 0.75    | 0.43–1.30 | 0.299  | 0.69    | 0.32–1.46 | 0.328  |
| Ethnicity                                          |                      |           |        |         |           |        |         |           |        |                          |           |        |         |           |        |         |           |        |
| Hispanic/Latinx                                    |                      |           |        | Ref.    | -         | -      | Ref.    | -         | -      |                          |           |        | Ref.    | -         | -      | Ref.    | -         | -      |
| Non-Hispanic/Latinx                                |                      |           |        | 1.38    | 1.04–1.84 | 0.025  | 1.31    | 0.91–1.87 | 0.142  |                          |           |        | 1.19    | 0.67–2.11 | 0.545  | 1.28    | 0.59–2.77 | 0.540  |
| Smoking                                            |                      |           |        |         |           |        |         |           |        |                          |           |        |         |           |        |         |           |        |
| Former                                             |                      |           |        | Ref.    | -         | -      | Ref.    | -         | -      |                          |           |        | Ref.    | -         | -      | Ref.    | -         | -      |
| Current                                            |                      |           |        | 1.89    | 1.76–2.0  | <0.001 | 1.82    | 1.66–2.0  | <0.001 |                          |           |        | 2.00    | 1.72–2.34 | <0.001 | 1.89    | 1.54–2.33 | <0.001 |
| Packyears (per 1 pack year)                        |                      |           |        | 1.01    | 1.01–1.01 | <0.001 | 1.01    | 1.01–1.01 | <0.001 |                          |           |        | 1.01    | 1.00–1.01 | <0.001 | 1.01    | 1.00–1.01 | 0.001  |
| Diabetes                                           |                      |           |        | 1.59    | 1.44–1.77 | <0.001 | 1.51    | 1.31–1.73 | <0.001 |                          |           |        | 1.92    | 1.56–2.36 | <0.001 | 1.58    | 1.19–2.09 | 0.002  |
| Hypertension                                       |                      |           |        | 1.19    | 1.11–1.28 | <0.001 | 1.11    | 1.01–1.22 | 0.029  |                          |           |        | 1.46    | 1.25–1.71 | <0.001 | 1.30    | 1.06–1.60 | 0.013  |
| Education                                          |                      |           |        |         |           |        |         |           |        |                          |           |        |         |           |        |         |           |        |
| High school graduate or below                      |                      |           |        | Ref.    | -         | -      | Ref.    | -         | -      |                          |           |        | Ref.    | -         | -      | Ref.    | -         | -      |
| Post high school (excl. college)                   |                      |           |        | 0.91    | 0.82–1.01 | 0.071  | 0.93    | 0.82–1.07 | 0.316  |                          |           |        | 0.81    | 0.63–1.04 | 0.094  | 0.98    | 0.72–1.33 | 0.889  |
| Some college or bachelor's degree                  |                      |           |        | 0.79    | 0.73–0.85 | <0.001 | 0.77    | 0.70–0.86 | <0.001 |                          |           |        | 0.88    | 0.74–1.05 | 0.164  | 0.86    | 0.68–1.08 | 0.196  |
| Graduate school                                    |                      |           |        | 0.69    | 0.62–0.77 | <0.001 | 0.65    | 0.56–0.76 | <0.001 |                          |           |        | 0.86    | 0.67–1.09 | 0.201  | 0.70    | 0.50–0.99 | 0.042  |
| BMI (per 1 kg/m <sup>2</sup> )                     |                      |           |        | 0.98    | 0.97–0.99 | <0.001 | 0.98    | 0.97–0.99 | <0.001 |                          |           |        | 1.01    | 0.99–1.02 | 0.513  | 1.02    | 1.00–1.05 | 0.021  |

\*CAC score was available in a subgroup of 13,966 participants. BMI = body mass index, CAC =

coronary artery calcium, EAT = epicardial adipose tissue, MI = myocardial infarction.

**Supplementary Table 3.** Association of EAT measures with all-cause and cardiovascular mortality in a subgroup of participants **without CAC** at baseline (n=3,355)

|                                                    | All-cause mortality  |           |        |         |           |        | Cardiovascular mortality |           |        |         |           |        |
|----------------------------------------------------|----------------------|-----------|--------|---------|-----------|--------|--------------------------|-----------|--------|---------|-----------|--------|
|                                                    | Model 1 (bivariable) |           |        | Model 2 |           |        | Model 1 (bivariable)     |           |        | Model 2 |           |        |
|                                                    | HR                   | 95%CI     | P      | HR      | 95%CI     | P      | HR                       | 95%CI     | P      | HR      | 95%CI     | P      |
| EAT volume –per 10 cm <sup>3</sup> /m <sup>2</sup> | 1.19                 | 1.12–1.26 | <0.001 | 1.10    | 1.03–1.17 | 0.003  | 1.33                     | 1.17–1.51 | <0.001 | 1.21    | 1.05–1.40 | 0.01   |
| EAT density –per 10 HU                             | 1.33                 | 1.00–1.77 | 0.05   | 1.11    | 0.83–1.49 | 0.488  | 2.05                     | 1.03–4.09 | 0.042  | 1.83    | 0.90–3.71 | 0.09   |
| Age –years                                         |                      |           |        | 1.09    | 1.06–1.11 | <0.001 |                          |           |        | 1.10    | 1.05–1.16 | <0.001 |
| Male sex                                           |                      |           |        | 1.45    | 1.17–1.79 | 0.001  |                          |           |        | 1.08    | 0.64–1.83 | 0.77   |
| Race                                               |                      |           |        |         |           |        |                          |           |        |         |           |        |
| White                                              |                      |           |        | Ref.    | -         | -      |                          |           |        | Ref.    | -         | -      |
| African American                                   |                      |           |        | 1.53    | 1.03–2.27 | 0.03   |                          |           |        | 3.58    | 1.64–7.82 | 0.001  |
| Asian                                              |                      |           |        | 0.59    | 0.28–1.27 | 0.18   |                          |           |        | 0.74    | 0.10–5.63 | 0.774  |
| Ethnicity                                          |                      |           |        |         |           |        |                          |           |        |         |           |        |
| Hispanic/Latinx                                    |                      |           |        | Ref.    | -         | -      |                          |           |        | Ref.    | -         | -      |
| Non-Hispanic/Latinx                                |                      |           |        | 0.83    | 0.40–1.72 | 0.611  |                          |           |        | 0.64    | 0.14–2.96 | 0.567  |
| Smoking                                            |                      |           |        |         |           |        |                          |           |        |         |           |        |
| Former                                             |                      |           |        | Ref.    | -         | -      |                          |           |        | Ref.    | -         | -      |
| Current                                            |                      |           |        | 1.66    | 1.34–2.05 | <0.001 |                          |           |        | 1.83    | 1.08–3.12 | 0.03   |
| Packyears (per 1 pack year)                        |                      |           |        | 1.01    | 1.00–1.01 | <0.001 |                          |           |        | 1.01    | 1.00–1.02 | 0.04   |
| History of heart disease                           |                      |           |        | 1.68    | 1.20–2.37 | <0.001 |                          |           |        | 4.19    | 2.18–8.04 | <0.001 |
| History of stroke                                  |                      |           |        | 1.05    | 0.58–1.89 | 0.882  |                          |           |        | 0.89    | 0.21–3.87 | 0.878  |
| Diabetes                                           |                      |           |        | 1.76    | 1.28–2.42 | 0.001  |                          |           |        | 1.70    | 0.82–3.53 | 0.153  |
| Hypertension                                       |                      |           |        | 1.03    | 0.82–1.29 | 0.807  |                          |           |        | 0.67    | 0.38–1.20 | 0.178  |
| Education                                          |                      |           |        |         |           |        |                          |           |        |         |           |        |
| High school graduate or below                      |                      |           |        | Ref.    | -         | -      |                          |           |        | Ref.    | -         | -      |
| Post high school (excl. college)                   |                      |           |        | 1.08    | 0.80–1.47 | 0.646  |                          |           |        | 1.22    | 0.55–2.72 | 0.630  |
| Some college or bachelor's degree                  |                      |           |        | 0.85    | 0.67–1.08 | 0.184  |                          |           |        | 1.13    | 0.62–2.06 | 0.680  |
| Graduate school                                    |                      |           |        | 0.61    | 0.42–0.89 | 0.01   |                          |           |        | 0.53    | 0.18–1.58 | 0.258  |
| BMI (per 1 kg/m <sup>2</sup> )                     |                      |           |        | 0.98    | 0.98–1.00 | 0.09   |                          |           |        | 1.03    | 0.98–1.09 | 0.198  |

BMI = body mass index, EAT = epicardial adipose tissue.

**Supplementary Table 4.** Association of EAT volume and density with all-cause and cardiovascular mortality

|                                                    | All-cause mortality  |           |        |         |           |        |         |           |        | Cardiovascular mortality |           |        |         |           |        |         |           |        |
|----------------------------------------------------|----------------------|-----------|--------|---------|-----------|--------|---------|-----------|--------|--------------------------|-----------|--------|---------|-----------|--------|---------|-----------|--------|
|                                                    | Model 1 (bivariable) |           |        | Model 2 |           |        | Model 3 |           |        | Model 1 (bivariable)     |           |        | Model 2 |           |        | Model 3 |           |        |
|                                                    | HR                   | 95%CI     | P      | HR      | 95%CI     | P      | HR      | 95%CI     | P      | HR                       | 95%CI     | P      | HR      | 95%CI     | P      | HR      | 95%CI     | P      |
| EAT volume –per 10 cm <sup>3</sup> /m <sup>2</sup> | 1.19                 | 1.17–1.21 | <0.001 | 1.10    | 1.08–1.12 | <0.001 | 1.10    | 1.08–1.13 | <0.001 | 1.27                     | 1.23–1.30 | <0.001 | 1.15    | 1.11–1.19 | <0.001 | 1.14    | 1.10–1.19 | <0.001 |
| EAT density –per 10 HU                             | 1.66                 | 1.53–1.80 | <0.001 | 1.36    | 1.26–1.48 | <0.001 | 1.38    | 1.24–1.54 | <0.001 | 2.14                     | 1.81–2.52 | <0.001 | 1.76    | 1.49–2.09 | <0.001 | 1.78    | 1.42–2.22 | <0.001 |
| Age –years                                         |                      |           |        | 1.09    | 1.08–1.10 | <0.001 | 1.08    | 1.07–1.09 | <0.001 |                          |           |        | 1.09    | 1.08–1.11 | <0.001 | 1.08    | 1.06–1.10 | <0.001 |
| Male sex                                           |                      |           |        | 1.28    | 1.20–1.37 | <0.001 | 1.22    | 1.12–1.32 | <0.001 |                          |           |        | 1.39    | 1.21–1.59 | <0.001 | 1.17    | 0.97–1.40 | 0.10   |
| Race                                               |                      |           |        |         |           |        |         |           |        |                          |           |        |         |           |        |         |           |        |
| White                                              |                      |           |        | Ref.    | -         | -      | Ref.    | -         | -      |                          |           |        | Ref.    | -         | -      | Ref.    | -         | -      |
| African American                                   |                      |           |        | 1.35    | 1.18–1.54 | <0.001 | 1.39    | 1.17–1.66 | <0.001 |                          |           |        | 1.69    | 1.33–2.16 | <0.001 | 1.94    | 1.41–2.68 | <0.001 |
| Asian                                              |                      |           |        | 0.62    | 0.50–0.78 | <0.001 | 0.63    | 0.47–0.84 | 0.002  |                          |           |        | 0.68    | 0.42–1.08 | 0.10   | 0.74    | 0.40–1.35 | 0.33   |
| Ethnicity                                          |                      |           |        |         |           |        |         |           |        |                          |           |        |         |           |        |         |           |        |
| Hispanic/Latinx                                    |                      |           |        | Ref.    | -         | -      | Ref.    | -         | -      |                          |           |        | Ref.    | -         | -      | Ref.    | -         | -      |
| Non-Hispanic/Latinx                                |                      |           |        | 1.51    | 1.17–1.96 | 0.002  | 1.46    | 1.06–2.02 | 0.02   |                          |           |        | 1.32    | 0.81–2.17 | 0.26   | 1.62    | 0.82–3.19 | 0.16   |
| Smoking                                            |                      |           |        |         |           |        |         |           |        |                          |           |        |         |           |        |         |           |        |
| Former                                             |                      |           |        | Ref.    | -         | -      | Ref.    | -         | -      |                          |           |        | Ref.    | -         | -      | Ref.    | -         | -      |
| Current                                            |                      |           |        | 1.82    | 1.71–1.93 | <0.001 | 1.78    | 1.64–1.92 | <0.001 |                          |           |        | 1.95    | 1.72–2.21 | <0.001 | 2.03    | 1.72–2.40 | <0.001 |
| Pack years (per 1 pack year)                       |                      |           |        | 1.01    | 1.01–1.01 | <0.001 | 1.01    | 1.01–1.01 | <0.001 |                          |           |        | 1.01    | 1.00–1.01 | <0.001 | 1.01    | 1.00–1.01 | 0.001  |
| History of heart disease                           |                      |           |        | 1.46    | 1.35–1.57 | <0.001 | 1.31    | 1.19–1.45 | <0.001 |                          |           |        | 2.01    | 1.75–2.31 | <0.001 | 1.72    | 1.42–2.07 | <0.001 |
| History of stroke                                  |                      |           |        | 1.44    | 1.26–1.65 | <0.001 | 1.41    | 1.19–1.67 | <0.001 |                          |           |        | 2.08    | 1.66–2.60 | <0.001 | 1.88    | 1.40–2.53 | <0.001 |
| Diabetes                                           |                      |           |        | 1.63    | 1.50–1.77 | <0.001 | 1.53    | 1.37–1.71 | <0.001 |                          |           |        | 1.78    | 1.52–2.08 | <0.001 | 1.51    | 1.22–1.87 | <0.001 |
| Hypertension                                       |                      |           |        | 1.19    | 1.12–1.26 | <0.001 | 1.11    | 1.03–1.21 | 0.008  |                          |           |        | 1.39    | 1.23–1.58 | <0.001 | 1.26    | 1.06–1.49 | 0.007  |
| Education                                          |                      |           |        |         |           |        |         |           |        |                          |           |        |         |           |        |         |           |        |
| High school graduate or below                      |                      |           |        | Ref.    | -         | -      | Ref.    | -         | -      |                          |           |        | Ref.    | -         | -      | Ref.    | -         | -      |
| Post high school (excl. college)                   |                      |           |        | 0.93    | 0.85–1.02 | 0.105  | 0.94    | 0.84–1.06 | 0.29   |                          |           |        | 0.87    | 0.72–1.05 | 0.15   | 0.99    | 0.78–1.26 | 0.95   |
| Some college or bachelor's degree                  |                      |           |        | 0.80    | 0.75–0.86 | <0.001 | 0.77    | 0.70–0.84 | <0.001 |                          |           |        | 0.85    | 0.74–0.99 | 0.03   | 0.80    | 0.66–0.97 | 0.02   |
| Graduate school                                    |                      |           |        | 0.71    | 0.64–0.78 | <0.001 | 0.68    | 0.60–0.77 | <0.001 |                          |           |        | 0.78    | 0.64–0.99 | 0.02   | 0.67    | 0.51–0.88 | 0.004  |
| BMI (per 1 kg/m <sup>2</sup> )                     |                      |           |        | 0.98    | 0.97–0.99 | <0.001 | 0.99    | 0.98–1.00 | 0.001  |                          |           |        | 1.01    | 1.00–1.02 | 0.16   | 1.03    | 1.01–1.04 | 0.002  |
| CAC score                                          |                      |           |        |         |           |        |         |           |        |                          |           |        |         |           |        |         |           |        |
| 0                                                  |                      |           |        |         |           |        | Ref.    | -         | -      |                          |           |        |         |           |        | Ref.    | -         | -      |
| 1–100                                              |                      |           |        |         |           |        | 1.22    | 1.08–1.38 | 0.002  |                          |           |        |         |           |        | 1.26    | 0.92–1.71 | 0.15   |
| 101–300                                            |                      |           |        |         |           |        | 1.41    | 1.23–1.62 | <0.001 |                          |           |        |         |           |        | 1.84    | 1.33–2.54 | <0.001 |
| >300                                               |                      |           |        |         |           |        | 1.71    | 1.51–1.94 | <0.001 |                          |           |        |         |           |        | 2.78    | 2.08–3.70 | <0.001 |

BMI = body mass index, CAC = coronary artery calcium, EAT = epicardial adipose tissue, MI = myocardial infarction.
