# Supplementary material for: Deep learning analysis of epicardial adipose tissue to predict cardiovascular risk in heavy smokers
Source: Springer Nature journal article supplement (doi:10.1038/s43856-024-00475-1), 2024-03-13
Supplement: 43856_2024_475_MOESM3_ESM.pdf [file 43856_2024_475_MOESM3_ESM.pdf]

# 1 **Description of Additional Supplementary Files**

2

3 **File Name:** Supplementary Data 1

4 **Description:** Table: EAT volume and density across clinical characteristics

5

6 **File Name:** Supplementary Data 2

7 **Description:** Source data (EAT volume and density measurements)
